# Supplementary material for: Association between Upper Digestive Tract Microbiota and Cancer-Predisposing States in the Esophagus and Stomach
Source: Oxford University Press journal article supplement (doi:10.1158/1055-9965.epi-13-0855), 2014-04-03
Supplement: 10559965epi130855-sup-118514_2_supp_2284613_mywhf4.xls [file 10559965epi130855-sup-118514_2_supp_2284613_mywhf4.xls]

## Sheet: supplementa.tabl2.1
Supplemental Table 1, Odds ratio and 95% confidence intervals for the associations between presence of individual strain/species and Esophageal Squamous Dysplasia (ESD) status
			Confidence Interval
Probe	Targeted strain name	Odd ratio	0.025	0.975	Pr(>|z|)
probe3	Bacteroidetes[G-2] sp clone AU126_ot274_K76	2.9281	0.634547	15.0909	0.165
probe4	Bacteroidetes[G-2] sp clone AU126_ot274_X57	0.760668	0.3084	1.70615	0.525
probe9	Bergeyella sp clone AK152_ot322_AD84	1.4359	0.187034	8.78965	0.694
probe10	Capnocytophaga granulosa and sp clone BB167_ot325_326_AA89	0.775368	0.466476	1.30164	0.33
probe12	Capnocytophaga sputigena_ot775_W46	0.859838	0.483343	1.49136	0.598
probe13	Capnocytophaga sputigena_ot775_AC15	0.932449	0.348894	2.25968	0.882
probe16	Capnocytophaga sp clones BM058 and BU084_ot329_O08	1.23249	0.316966	4.17554	0.743
probe17	Capnocytophaga sp clone BB167_ot326_O09	2.60438	0.844387	8.28035	0.0927	.
probe18	Capnocytophaga sp clone BR085_ot329_Y81	3.58e-08	NA	Inf	0.997
probe19	Capnocytophaga sp clone DS022_ot332_W48	0.945627	0.444387	1.90932	0.88
probe20	Capnocytophaga sp clone DS022_ot332_X53	1.3552	0.401	4.1649	0.602
probe22	Capnocytophaga sp clone _X066_ot335_AD22	0.786072	0.455275	1.32811	0.377
probe24	Sphaerocytophaga S3_ot337_O04	3.21e-08	NA	3.24e+165	0.995
probe25	Sphaerocytophaga S3_ot337_X23	2.16346	0.256729	18.2326	0.443
probe26	Porphyromonas catoniae and sp clone CW034_ot279_283_N95	0.29932	0.0159082	1.71228	0.262
probe30	Porphyromonas endodontalis and sp clones_F016 and P4GB_100_ot273_285_395_W78	0.644387	0.393556	1.04135	0.076	.
probe31	Porphyromonas gingivalis_ot619_X21	0.377622	0.0577548	1.43901	0.211
probe32	Porphyromonas gingivalis_ot619_AA93	0.839911	0.485455	1.4229	0.523
probe33	Porphyromonas sp clone DP023_ot279_Q93	0.422857	0.0219244	2.6649	0.435
probe36	Prevotella denticola_ot291_K73	0.945627	0.444387	1.90932	0.88
probe37	Prevotella histicola_ot298_AD71	0.554248	0.155008	1.57203	0.305
probe38	Prevotella histicola_ot298_AD72	0.915395	0.194304	3.36516	0.9
probe40	Prevotella intermedia_ot643_AB92	0.571933	0.127352	1.87813	0.399
probe41	Prevotella intermedia_ot643_AD06	0.632039	0.139528	2.1172	0.493
probe42	Prevotella melaninogenica and sp clone BE073_ot298_469_T81	0.516963	0.304946	0.87986	0.0144	*
probe44	Prevotella multisaccharivorax_ot794_AC59	1.17642	0.573589	2.32623	0.647
probe45	Prevotella nigrescens_ot693_W40	1.22358	0.502039	2.81425	0.642
probe46	Prevotella oralis_ot705_X76	163000000	0	NA	0.997
probe48	Prevotella oris_ot311_Y66	0.935579	0.426251	1.93674	0.862
probe49	Prevotella oulora_ot288_AA52	1.4359	0.187034	8.78965	0.694
probe50	Prevotella pallens and sp clone DR022_ot310_714_R67	0.766778	0.475468	1.24244	0.278
probe52	Prevotella tannerae_ot466_AB03	0.382711	0.126527	0.948353	0.0563	.
probe53	Prevotella sp clones AA016 and AA020 and W1609_ot289_AC94	3.58e-08	NA	Inf	0.997
probe56	Prevotella sp clone BI027_ot299_X15	1.3552	0.401	4.1649	0.602
probe58	Prevotella sp clone DO039_ot308_Q94	0.722919	0.449405	1.16686	0.182
probe59	Prevotella sp clone DO045_ot309_Q97	0.541949	0.175693	1.3922	0.236
probe60	Prevotella sp clone DO045_ot309_X59	1.26349	0.639249	2.42638	0.489
probe61	Prevotella sp clone DR022_ot310_Y67	1.13584	0.509657	2.40769	0.745
probe63	Prevotella sp strains C3MKM081 and TFI B31FD_ot317_AB21	3.58e-08	NA	Inf	0.997
probe64	Prevotella loescheii and sp clone GU027_ot472_658_Y64	0.488909	0.237708	0.938618	0.0395	*
probe65	Prevotella Cluster I_ot317_472_658_Y65	0.541949	0.175693	1.3922	0.236
probe66	Prevotella Cluster II_ot291_685_782_X13	0.708333	0.102594	3.13412	0.676
probe67	Prevotella Cluster III_ot306_310_313_AB01	0.629228	0.353742	1.08544	0.104
probe69	Prevotella Cluster IV_ot658_693_714_782_AA44	0.618641	0.353385	1.0943	0.0947	.
probe70	Tannerella forsythensis_ot613_X56	0.903083	0.568523	1.43259	0.665
probe71	Tannerella sp clone BU063_ot286_T83	0.696667	0.246377	1.71865	0.458
probe72	Acinetobacter baumannii_ot554_AD86	121000000	3.31e-226	NA	0.995
probe75	Aggregatibacter segnis and sp clone MB3_C24_ot512_762_P05	1.16704	0.729859	1.86078	0.51696
probe76	Aggregatibacter segnis and sp clone MB3_C24_ot512_762_AA78	1.30254	0.614154	2.66613	0.477
probe81	Cardiobacterium valvulum_ot540_AD79	0.48562	0.158518	1.23172	0.158
probe82	Cardiobacterium valvulum_ot540_AD80	2.15238	0.0845703	54.7809	0.589
probe83	Escherichia coli_ot574_AA74	3.58e-08	NA	Inf	0.997
probe84	Haemophilus influenzae_ot641_P03	3.58e-08	NA	Inf	0.997
probe85	Haemophilus parainfluenzae_ot718_W79	1.17117	0.247944	8.27141	0.852
probe86	Haemophilus sp clone BJ021_ot035_P07	1.23249	0.316966	4.17554	0.743
probe87	Haemophilus sp clone BJ095_ot036_X31	2.28723	0.982271	5.32907	0.0524	.
probe88	Haemophilus sp clone BJ095_ot036_AA97	1.36695	0.860788	2.1743	0.1854
probe91	Pseudomonas Cluster I_ot536_612_740_834_O96	1.71268	0.596749	4.72659	0.299
probe92	Stenotrophomonas maltophilia_ot663_AB85	3.58e-08	NA	Inf	0.997
probe93	Stenotrophomonas maltophilia_ot663_AB86	4.31e-08	NA	6.44e+68	0.992
probe95	Brevundimonas diminuta_ot590_AC90	0.696667	0.246377	1.71865	0.458
probe96	Ochrobactrum anthropi_ot544_AB23	2.15238	0.0845703	54.7809	0.589
probe98	Campylobacter concisus_ot575_O46	0.504638	0.315126	0.805156	0.00421	**
probe99	Campylobacter concisus_ot575_X33	0.805128	0.47586	1.33829	0.41
probe100	Campylobacter gracilis_ot623_Q04	163000000	0	NA	0.997
probe101	Campylobacter gracilis_ot623_X34	0.711111	0.0349495	5.62808	0.769
probe102	Campylobacter concisus and rectus_ot575_748_T86	0.464947	0.270392	0.80129	0.00558	**
probe103	Campylobacter concisus and rectus_ot575_748_X36	0.615845	0.133452	3.17336	0.531
probe104	Campylobacter showae_ot763_W36	0.63491	0.397295	1.00889	0.0556	.
probe105	Campylobacter showae_ot763_X35	0.722886	0.453317	1.15351	0.17253
probe106	Campylobacter Cluster I_ot580_748_763_T87	0.641157	0.382972	1.05417	0.084465	.
probe107	Campylobacter Cluster II_ot580_748_763_X37	0.69801	0.418535	1.14505	0.16
probe108	Achromobacter xylosoxidans_ot343_AC18	1.37436	0.690868	2.66413	0.353
probe109	Achromobacter xylosoxidans_ot343_AD25	163000000	0	NA	0.997
probe115	Eikenella corrodens and Kingella denitrificans and sp clone DE012_ot012_577_582_AD97	1.2932	0.261276	5.37156	0.728
probe116	Eikenella corrodens and Kingella denitrificans and sp clone DE012_ot012_577_582_AD98	1.71474	0.709074	4.03508	0.218
probe117	Kingella denitrificans_ot582_W30	1.26684	0.45926	3.24835	0.63
probe118	Kingella denitrificans_ot582_X41	1.08065	0.517227	2.1624	0.83
probe122	Lautropia mirabilis_ot022_X44	1.44444	0.362668	5.16621	0.575
probe125	Neisseria elongata_ot598_AA75	1.06293	0.664398	1.69413	0.79795
probe126	Neisseria flavescens_ot610_AA76	0.794774	0.480864	1.32616	0.374
probe127	Neisseria pharyngis_ot729_K71	0.781434	0.391062	1.48752	0.466
probe128	Neisseria pharyngis_ot729_AD08	0.672324	0.377234	1.1628	0.165
probe129	Neisseria pharyngis_ot729_AD93	0.618905	0.3443	1.07632	0.0975	.
probe130	Neisseria gonorrhoeae and polysaccharea_ot621_737_O76	1.0084	0.399629	2.34983	0.985
probe131	Neisseria sp strain B33KA_ot020_Y56	2.15238	0.0845703	54.7809	0.589
probe132	Neisseria Cluster I_ot621_669_737_Y60	2.17476	0.396693	11.9238	0.346
probe133	Neisseria Cluster II_ot014_609_682_764_O45	1.29921	0.812814	2.09327	0.2772
probe135	Neisseria Cluster IV_ot009_014_015_016_Y58	3.58e-08	NA	Inf	0.997
probe137	Acidaminococcaceae[G-1] sp clones _K024 and CS015_ot132_150_Y72	3.58e-08	NA	Inf	0.997
probe143	Acidaminococcaceae[G-1] sp clone C3MLM071 and sp strains FYA47 and GAA14_ot155_AB59	3.58e-08	NA	Inf	0.997
probe145	Acidaminococcaceae[G-2] sp clones CS002 and C5AKM062_ot131_X72	4.84e-08	NA	2.55e+202	0.995
probe146	Anaeroglobus geminatus_ot121_AA56	1.4359	0.187034	8.78965	0.694
probe147	Dialister invisus_ot118_P73	0.8577	0.393131	1.75914	0.685
probe148	Dialister invisus_ot118_AA94	1.075	0.365353	2.85239	0.888
probe149	Dialister pneumosintes_ot736_X78	1.02216	0.599751	1.71515	0.935
probe150	Megasphaera micronuciformis_ot122_AA57	0.516732	0.321653	0.823419	0.00582	**
probe151	Megasphaera micronuciformis_ot122_X28	0.621515	0.356307	1.05537	0.0849	.
probe152	Megasphaera sp clone CS025_ot123_Y85	163000000	0	NA	0.997
probe153	Megasphaera sp clone CS025_ot123_AD11	0.912857	0.315474	2.34819	0.856
probe154	Megasphaera sp clone CS025_ot123_AD96	2.15238	0.0845703	54.7809	0.589
probe155	Selenomonas artemidis_ot124_X66	0.526442	0.0785376	2.14578	0.422
probe156	Selenomonas artemidis_ot124_AA49	0.972097	0.299754	2.74854	0.959
probe160	Selenomonas infelix and sp clones EY047 and GT010 and IK004_ot126_479_481_639_O54	0.810127	0.489131	1.32353	0.406
probe162	Selenomonas noxia and sp clone EL028_ot130_140_AC04	3.58e-08	NA	Inf	0.997
probe163	Selenomonas sputigena and sp clone EW051a _ot143_151_AB04	0.819048	0.46126	1.41714	0.484
probe165	Selenomonas sputigena and sp clone EW051a_ot143_151_K65	0.737466	0.420798	1.26008	0.275
probe170	Selenomonas sp clones DD020 and P4PA_145_ot134_442_Y73	0.632039	0.139528	2.1172	0.493
probe172	Selenomonas sp clones DS071 and EW084_ot138_146_Q52	1.07353	0.281278	3.49069	0.909
probe173	Selenomonas sp clones DS071 and EW084_ot138_146_X69	163000000	0	NA	0.997
probe176	Selenomonas Cluster I_ot126_479_481_639_AC13	0.724046	0.294565	1.61481	0.451
probe177	Selenomonas Cluster sp clones DO042 and FT050 and GI064_ot136_149_478_AB61	0.822157	0.516739	1.30968	0.408
probe178	Veillonella atypica_ot524_W04	0.722519	0.446413	1.15829	0.1806
probe179	Veillonella atypica_ot524_W88	0.579121	0.271131	1.26251	0.16
probe180	Veillonella parvula_ot161_D96	0.479462	0.108213	1.52688	0.259
probe181	Veillonella parvula_ot161_AC37	0.537232	0.291253	0.999884	0.0473	*
probe182	Veillonella parvula_ot161_M04	0.397884	0.23977	0.659026	0.000343	***
probe183	Veillonella sp clones FO009 and HB016_ot780_AD02	1.03267	0.619801	1.70008	0.9
probe184	Veillonella atypica and parvula_ot161_524_Q67	0.548416	0.161549	1.94229	0.331
probe186	Bulleidia extructa_ot603_AD81	2.15238	0.0845703	54.7809	0.589
probe190	Solobacterium moorei_ot678_AC01	0.616121	0.291447	1.33435	0.208
probe191	Solobacterium moorei_ot678_AC02	0.750825	0.381746	1.52048	0.413
probe192	Clostridiales[F-2][G-1] sp clone _F058_ot075_AD78	0.523756	0.204208	1.18287	0.143
probe193	Clostridiales[F-2][G-2] sp clone BU014_ot085_R31	0.559099	0.323953	0.940279	0.0319	*
probe194	Parvimonas micra_ot111_L97	0.786925	0.463686	1.35297	0.379
probe195	Parvimonas micra_ot111_V05	1.07172	0.675519	1.70325	0.769
probe196	Peptostreptococcaceae[13][G-1] sp clone DA014_ot113_AD07	4.84e-08	NA	2.55e+202	0.995
probe197	Peptostreptococcaceae[13][G-1] sp clone DA014_ot113_P72	1.4359	0.187034	8.78965	0.694
probe198	Catonella morbi and sp clone BR063_ot164_165_O56	0.558165	0.261959	1.10457	0.109
probe199	Lachnospiraceae[G-3] sp clone DO008_ot096_R28	1.26759	0.563225	2.72883	0.552
probe200	Lachnospiraceae[G-3] sp clone DO008_ot096_AA70	0.736998	0.461897	1.17735	0.20036
probe201	Lachnospiraceae[G-5] sp clone BB124_ot080_AA65	3.58e-08	NA	Inf	0.997
probe202	Lachnospiraceae[G-4] sp clone DO016_ot097_R64	0.7625	0.475246	1.21514	0.257
probe205	Shuttleworthia satelles_ot095_AB54	0.646273	0.391605	1.05079	0.08226	.
probe206	Eubacterium[11][G-1] infirmum_ot105_Y45	0.291029	0.0973289	0.706376	0.0127	*
probe207	Eubacterium[11][G-1] sulci_ot467_R36	0.565517	0.353774	0.901944	0.0168	*
probe208	Eubacterium[11][G-1] sulci_ot467_Y98	0.504101	0.314611	0.80509	0.00421	**
probe209	Eubacterium[11][G-3] brachy_ot557_O47	0.711111	0.0349495	5.62808	0.769
probe210	Eubacterium[11][G-3] brachy_ot557_AC03	0.530952	0.0269643	3.64332	0.573
probe211	Eubacterium[11][G-5] saphenum_ot759_AA71	163000000	0	NA	0.997
probe213	Eubacterium[11][G-6] nodatum_ot694_Y46	0.422857	0.0219244	2.6649	0.435
probe214	Eubacterium[11][G-7] yurii_ot377_W84	0.462844	0.262029	0.79096	0.00606	**
probe215	Eubacterium[14][G-1] saburreum and Lachnospiraceae[G-1] sp clone BE088_ot082_494_AB50	0.751812	0.470245	1.20464	0.234
probe216	Eubacterium[14][G-1] saburreum_ot494_W21	0.682201	0.428222	1.08576	0.10658
probe218	Eubacterium sp clone BB142_ot081_K98	3.58e-08	NA	Inf	0.997
probe219	Filifactor alocis_ot539_AA69	0.433309	0.22193	0.798093	0.00992	**
probe220	Filifactor alocis_ot539_AB94	0.46828	0.275944	0.776138	0.00392	**
probe221	Filifactor alocis_ot539_AB95	0.549978	0.325495	0.909615	0.022186	*
probe224	Peptostreptococcaceae[11][G-4] sp clone MCE10_174 and sp strain PUS9.170_ot103_369_AB48	3.58e-08	NA	Inf	0.997
probe227	Peptostreptococcus stomatis_ot112_AA55	0.908307	0.491824	1.62752	0.752
probe230	Gemella haemolysans_ot626_K63	0.932736	0.179109	6.80503	0.937
probe231	Gemella morbillorum_ot046_AB09	4.34615	0.411894	94.1416	0.232
probe232	Gemella morbillorum_ot046_K64	0.986078	0.61577	1.57182	0.9532
probe233	Gemella sanguinis_ot757_AB17	0.85932	0.466494	1.53437	0.616
probe236	Abiotrophia defectiva_ot389_AB16	1.62379	0.315124	7.49333	0.531
probe239	Enterococcus saccharominimus and saccharolyticus_ot802_803_AB13	3.58e-08	NA	Inf	0.997
probe240	Enterococcus Cluster I_ot604_801_802_803_AB43	3.58e-08	NA	Inf	0.997
probe241	Granulicatella adiacens_ot534_AB30	0.842105	0.522271	1.34754	0.4765
probe242	Granulicatella adiacens and elegans_ot534_596_W81	1.10633	0.669378	1.85572	0.697
probe243	Granulicatella elegans_ot596_AB28	1.64062	1.0264	2.62405	0.0384	*
probe244	Granulicatella elegans_ot596_AB29	1.99149	0.987339	4.37441	0.0669	.
probe250	Lactobacillus gasseri and johnsonii_ot615_819_V86	1.07212	0.14695	5.58321	0.937
probe251	Lactobacillus salivarius and jensenii_ot756_839_AB14	2.16346	0.256729	18.2326	0.443
probe252	Lactobacillus vaginalis and coleohominis and sp strain DoxG2_ot051_052_816_W93	2.15238	0.0845703	54.7809	0.589
probe254	Lactobacillus Cluster I_ot568_716_749_W94	0.260714	0.0139624	1.44737	0.208
probe255	Lactococcus lactis_ot804_AB11	2.15238	0.0845703	54.7809	0.589
probe256	Streptococcus anginosus_ot543_AB84	0.853846	0.120898	4.03316	0.852
probe257	Streptococcus anginosus and gordonii_ot543_622_F49	1.47439	0.838093	2.56235	0.172
probe258	Streptococcus anginosus and intermedius_ot543_644_AB82	1.3737	0.582684	3.0984	0.451
probe259	Streptococcus australis and sp clone FN042_ot065_073_AB83	1.34047	0.840165	2.1547	0.222
probe260	Streptococcus australis and sp clone FN042_ot065_073_U50	1.22784	0.751867	1.99168	0.408
probe262	Streptococcus cristatus and sp clone BM035_ot058_578_AD88	4.34615	0.411894	94.1416	0.232
probe263	Streptococcus cristatus and sp clone BM035_ot058_578_AD89	3.58e-08	NA	Inf	0.997
probe264	Streptococcus cristatus and sp clone BM035_ot058_578_AA47	1.08824	0.598702	1.93246	0.776
probe265	Streptococcus downei_ot594_AD67	163000000	0	NA	0.997
probe266	Streptococcus downei_ot594_AD68	4.84e-08	NA	2.55e+202	0.995
probe268	Streptococcus infantis and sp clone FN042_ot065_638_Y74	1.46875	0.803622	2.80345	0.225
probe269	Streptococcus anginosus and intermedius_ot543_644_Q62	0.932736	0.179109	6.80503	0.937
probe270	Streptococcus constellatus and intermedius_ot576_644_AB77	1.03898	0.511132	2.02752	0.913
probe271	Streptococcus constellatus and intermedius_ot576_644_F48	0.912255	0.549347	1.49545	0.719
probe272	Streptococcus mitis bv2 and sp clone FP064_ot069_398_Q64	1.51822	0.909362	2.59033	0.117
probe276	Streptococcus parasanguis I and II and sinensis_ot411_721_767_AB99	0.684361	0.394728	1.15792	0.166
probe277	Streptococcus parasanguis I and II and sp clone BE024_ot057_411_721_V77	0.567861	0.33887	0.956401	0.0321	*
probe278	Streptococcus parasanguis I and II_ot411_721_AB05	1.13498	0.535766	2.57339	0.749
probe279	Streptococcus parasanguis I and II_ot057_411_721_R17	0.999061	0.608194	1.62479	0.997
probe281	Streptococcus salivarius and sp clone FO042_ot067_755_E34	1.03936	0.536566	2.10204	0.911
probe282	Streptococcus salivarius_ot755_X06	0.760723	0.396628	1.39974	0.393
probe283	Streptococcus sanguinis and sp clone C3MLM097_ot058_758_AB75	0.781119	0.440648	1.34847	0.385
probe284	Streptococcus sanguinis and sp clone C3MLM097_ot058_758_AB78	0.871964	0.523081	1.43317	0.593
probe286	Streptococcus sp strains Hans H6 and 7A_ot070_071_N20	1.19161	0.736028	1.95059	0.479824
probe287	Streptococcus Cluster I_ot058_398_423_728_734_AB98	1.43264	0.873323	2.38929	0.16
probe288	Streptococcus Cluster II_ot071_755_758_Q59	0.608828	0.206334	1.89256	0.37
probe290	Fusobacterium naviforme and nucleatum ss vincentii_ot200_M22	3.58e-08	NA	Inf	0.997
probe291	Fusobacterium periodontium_ot201_R20	0.930876	0.321933	3.05308	0.898
probe292	Fusobacterium sp clones BB002 and FB074_ot210_220_Y92	2.15238	0.0845703	54.7809	0.589
probe295	Fusobacterium nucleatum ss nucleatum and animalis_ot420_698_AD99	0.739394	0.386006	1.35804	0.344
probe296	Fusobacterium nucleatum ss nucleatum and animalis_ot420_698_AE01	0.929577	0.374365	2.51882	0.879
probe297	Leptotrichia hofstadii_ot224_AA58	3.58e-08	NA	Inf	0.997
probe298	Leptotrichia hofstadii and sp strain _F138_ot223_224_Y55	3.21e-08	NA	3.24e+165	0.995
probe299	Leptotrichia sp clone C3MKM102_ot417_AA60	0.732088	0.338874	1.47916	0.403
probe300	Leptotrichia sp clone DR011_ot215_AA59	0.526442	0.0785376	2.14578	0.422
probe301	Leptotrichia sp clones C3MKM102 and GT018_ot417_462_T27	0.681439	0.426588	1.08264	0.106
probe302	Leptotrichia buccalis and goodfellowii and Sneathia sanguinegens_ot563_837_845_AA45	0.0737463	0.0038779	0.439337	0.0164	*
probe303	SR1[G-1] sp _X112_ot345_AC72	1.62379	0.315124	7.49333	0.531
probe304	SR1[G-1] sp _X112_ot345_AC73	163000000	0	NA	0.997
probe305	Synergistetes[G-3] sp clone D084_ot362_P97	121000000	3.31e-226	NA	0.995
probe306	Synergistetes[G-3] sp clone W090_ot363_AC54	1.18956	0.549279	2.46708	0.648
probe311	Synergistetes[G-3] sp clone BH007_ot359_AC53	1.07143	0.0494664	11.3053	0.955
probe312	Synergistetes[G-3] sp clone BH017_ot360_AD66	0.877746	0.550884	1.3937	0.581
probe319	Treponema maltophilum_ot664_Q01	3.58e-08	NA	Inf	0.997
probe322	Treponema medium_ot667_W76	3.58e-08	NA	Inf	0.997
probe333	Treponema Cluster I_ot262_264_265_541_AC41	2.15238	0.0845703	54.7809	0.589
probe347	Actinomyces georgiae_ot617_M52	0.571933	0.127352	1.87813	0.399
probe348	Actinomyces gerencseriae_ot618_E46	1.027	0.464633	2.14918	0.945
probe355	Actinomyces viscosus and sp clone AG004_ot169_688_AD82	1.4359	0.187034	8.78965	0.694
probe360	Actinomyces sp clone EP053_ot177_X45	0.949891	0.25262	2.99089	0.933
probe361	Actinomyces sp clones IP073 and IO076_ot446_448_AC70	3.58e-08	NA	Inf	0.997
probe362	Actinomyces sp clone IP073_ot448_AB36	3.58e-08	NA	Inf	0.997
probe366	Actinomyces Cluster I_ot671_688_701_708_AB35	1.07282	0.222977	4.15068	0.922
probe367	Actinomyces Cluster II_ot180_181_671_701_AC99	0.429624	0.209804	0.819544	0.0143	*
probe370	Corynebacterium matruchotii_ot666_AC67	163000000	0	NA	0.997
probe372	Propionibacterium acnes_ot530_AB74	2.9281	0.634547	15.0909	0.165
probe374	Propionibacterium propionicum_ot739_AB72	3.58e-08	NA	Inf	0.997
probe376	Propionibacterium sp strain FMA5_ot191_AD69	3.58e-08	NA	Inf	0.997
probe377	Mycobacterium neoaurum and tuberculosis_ot692_822_AD28	0.770053	0.209424	2.31289	0.661
probe380	Rothia dentocariosa_ot587_W98	163000000	0	NA	0.997
probe381	Rothia dentocariosa and mucilaginosa_ot587_681_E52	1.65183	0.950652	2.96739	0.0826	.
probe382	Rothia mucilaginosa_ot681_AB62	1.50436	0.945525	2.40948	0.0865	.
probe383	Rothia mucilaginosa_ot681_AB63	1.30106	0.807217	2.11963	0.28425
probe386	Bifidobacterium dentium_ot588_AA62	2.16346	0.256729	18.2326	0.443
probe388	Bifidobacteriaceae Family Cluster II_ot198_407_586_588_W96	163000000	0	NA	0.997
probe390	Scardovia inopinata_ot642_AB33	3.21e-08	NA	3.24e+165	0.995
probe392	Scardovia sp clone CX010 and sp strains A32ED and C1A_55_ot195_Q57	2.15238	0.0845703	54.7809	0.589
probe394	Atopobium parvulum_ot723_X29	0.711111	0.0349495	5.62808	0.769
probe395	Atopobium rimae_ot750_K24	3.58e-08	NA	Inf	0.997
probe396	Atopobium rimae_ot750_X12	4.84e-08	NA	2.55e+202	0.995
probe397	Atopobium sp clone C3MLM018_ot416_T49	0.853846	0.120898	4.03316	0.852
probe398	Atopobium sp clone C3MLM018_ot416_X30	0.753182	0.238117	2.02876	0.596
probe407	Slackia exigua_ot602_AC97	1.21248	0.764345	1.92752	0.413
probe410	Exiguobacterium aurantiacum_not_oral_AB46	0.708333	0.102594	3.13412	0.676
probe411	Exiguobacterium aurantiacum_not_oral_AB47	4.84e-08	NA	2.55e+202	0.995
probe413	Bacteroides fragilis_not_oral_AD54-C	3.21e-08	NA	3.24e+165	0.995
probe414	Bacteroides fragilis_not_oral_AD55-C	3.58e-08	NA	Inf	0.997
probe422	Veillonella EF509966 Crohn's_not_oral_AD63-C	0.976351	0.592272	1.59209	0.924
Note, based on the logistic regression model (presence/absence of individual targed species/strain =ESD status); statistics for probes which show no variation in our samples are not shown in the table; .P<0.01, *p<0.05; **P<0.01; ***P<0.001
